# Supplementary material for: EPR-Spin Trapping and Flow Cytometric Studies of Free Radicals Generated Using Cold Atmospheric Argon Plasma and X-Ray Irradiation in Aqueous Solutions and Intracellular Milieu
Source: PLoS One. 2015 Aug 28;10(8):e0136956. doi: 10.1371/journal.pone.0136956 (PMC4552761; doi:10.1371/journal.pone.0136956)
Supplement: S1 File — Biological effects were determined based on apoptosis induction in U937 cells assessed flow cytometrically. Formation of free radicals was traced by different methods. In extracellular milieu, different spin adducts were detected by EPR spin trapping method. In presence of cells, various intracellular fluorescent probes were used with flow cytometry. Moreover, the overall chemical activity of Ar-CAP was detected with Fricke dosimeter. Data are given as mean ± SD. (XLSX) [file pone.0136956.s001.xlsx]

## Sheet: Figure 3
Ar-plasma
Time, min	OD (average)	SD
0	0	0
15	0.4602	0.01
30	0.9025	0.052
60	1.523	0.069

## Sheet: Figure 5
		primary y-axis	secondary y-axis
	concentration (%)	EPR - ratio (OH )	EPR - ratio (Ethanol )
	0.04	3.66	0.24
	0.05	3.6	0.4
	0.07	2.8	0.35
	0.1	2.3	0.52
	0.125	1.39	0.6
	0.15	1.16	0.72
	0.2	0.48	0.67
	0.5	0.2	0.69

## Sheet: Figure 6a
	distance (mm)	EPR - ratio - %	SD
	8	100	0
	10	91.17	12.91
	12	78.23	4.78
	14	45.9	4.81
	16	9.07	3.92

## Sheet: Figure 6b
	time (S)	average	std. dev.
	15	3.64333	0.260427
	30	5.94	0.523323
	45	7.11	0.311127
	60	8.37667	0.32968

## Sheet: Figure 7
		EPR-A	EPR-SD	kJ/mol
	Kr	14.3	1.2	1350.8
	Ar	10.5	0.56	1520.6
	Ne	10.4	0.53	2080.7
	He	5.63	1.17	2372.3
		Kr	Ar	Ne	He
	kJ/mol	1350.8	1520.6	2080.7	2372.3
	ESR	14.3	10.5	10.4	5.63
	SD	1.2	0.56	0.53	1.17

## Sheet: Figure 10
U937	6 h	X-ray		Annexin V-FITC, PI
		Gy	Average	SD
		0	2.45667	0.410163
		5	4.55333	1.19559
		7.5	13.2467	0.212211
		10	19.86	4.16384
	Ar-CAP
Second	Apoptosis	SD
0	2.64	0.5
30	5.2	1.08
60	13.25	0.92
120	28.26	9.68
